# Supplementary material for: High Variability and Dual Strategy in the Wintering Red Kites (Milvus milvus)
Source: MDPI journal article supplement (doi:10.3390/d14020117), 2022-02-07

## SUPPLEMENTARY MATERIALS

**Table S1.** Parameters of 44 Red Kites tracked by GPS/satellite telemetry tagged in Spain during the wintering season. Sex (F: female, M: male) and Age (A: adult, I: immature) are indicated together with bird ID. The wintering province in Spain and the summer destination after the spring migration are also shown. A hyphen (-) indicates that information is not available. *Italics* on dates indicate that they correspond to the beginning/end of measuring, not to beginning/end of wintering, so those were considered as “partial” winterings.

| Name              | Age | Sex | Wintering | Latitude<br>(wintering) | Breeding    | Beginning of<br>wintering | End of<br>wintering | No<br>Days | Season        |
|-------------------|-----|-----|-----------|-------------------------|-------------|---------------------------|---------------------|------------|---------------|
| <b>Huesca 01</b>  | A   | F   | Huesca    | 41.83267                | Switzerland | 2-dec.                    | 20-feb.             | 80         | 2013-<br>2014 |
|                   | A   | F   | Huesca    | 41.83500                | Switzerland | 16-dec.                   | 14-feb.             | 60         | 2014-<br>2015 |
|                   | A   | F   | Huesca    | 41.83033                | Switzerland | 14-nov.                   | 6-feb.              | 84         | 2015-<br>2016 |
|                   | A   | F   | Huesca    | 41.85850                | Switzerland | 7-jan.                    | 21-feb.             | 45         | 2016-<br>2017 |
|                   | A   | F   | Huesca    | 41.88200                | Switzerland | 12-jan.                   | 14-feb.             | 33         | 2017-<br>2018 |
|                   | A   | F   | Huesca    | 41.84386                | Switzerland | 10-dec.                   | 16-feb.             | 68         | 2018-<br>2019 |
| <b>Segovia 02</b> | A   | F   | Segovia   | 41.23400                | Germany     | <i>7-feb.</i>             | 11-apr.             | 63         | 2012-<br>2013 |
|                   | A   | F   | Segovia   | 41.44900                | Germany     | 18-oct.                   | <i>3-feb.</i>       | 108        | 2013-<br>2014 |
| <b>Álava 01</b>   | A   | M   | Álava     | 42.59118                | France      | <i>2-feb.</i>             | 12-feb.             | 10         | 2013-<br>2014 |
| <b>Álava 02</b>   | A   | M   | Álava     | 43.03312                | Germany     | <i>17-feb.</i>            | 13-mar.             | 24         | 2013-<br>2014 |

|                   |   |   |                  |           |             |                |                |     |           |
|-------------------|---|---|------------------|-----------|-------------|----------------|----------------|-----|-----------|
| <b>Álava 03</b>   | A | M | Álava            | 43.03410  | Germany     | <i>18-feb.</i> | 13-mar.        | 23  | 2013-2014 |
| <b>Álava 04</b>   | A | M | Álava            | 43.07485  | Germany     | <i>17-feb.</i> | 20-mar.        | 31  | 2013-2014 |
|                   | A | M | France/Álava     | 43.97387  | Germany     | 11-nov.        | 28-feb.        | 109 | 2014-2015 |
| <b>Álava 05</b>   | A | F | Álava            | 43.10015  | Poland      | <i>12-feb.</i> | 1-mar.         | 17  | 2014-2015 |
|                   | A | F | Álava            | 43.06533  | Poland      | 28-oct.        | 12-feb.        | 107 | 2015-2016 |
|                   | A | F | Álava/France     | 43.06567  | Poland      | 12-jan.        | 13-feb.        | 32  | 2016-2017 |
|                   | A | F | Álava            | 43.08320  | Poland      | 13-nov.        | 24-feb.        | 103 | 2017-2018 |
|                   | A | F | Álava            | 43.10017  | Poland      | 24-oct.        | 14-feb.        | 113 | 2018-2019 |
|                   | A | F | France           | 44.94693  | Poland      | 13-nov.        | 27-jan.        | 75  | 2019-2020 |
| <b>Álava 06</b>   | A | M | Huesca           | 43.100183 | Germany     | <i>13-feb.</i> | 27-feb.        | 14  | 2014-2015 |
| <b>Huesca 03</b>  | A | M | Huesca           | 41.87467  | Poland      | <i>2-feb.</i>  | 6-jun.         | 124 | 2012-2013 |
|                   | A | M | Huesca           | 41.88654  | Poland      | 20-nov.        | 15-mar.        | 115 | 2013-2014 |
| <b>Segovia 03</b> | A | M | Segovia/Pamplona | 42.88165  | Switzerland | <i>7-feb.</i>  | <i>10-apr.</i> | 62  | 2012-2013 |
| <b>Huesca 07</b>  | A | M | Huesca           | 41.830567 | Germany     | 2-nov.         | 9-mar.         | 127 | 2015-2016 |
|                   | A | M | Huesca           | 41.829267 | Germany     | 21-oct.        | 18-feb.        | 120 | 2016-2017 |
|                   | A | M | Huesca           | 41.83285  | Germany     | 7-nov.         | 16-feb.        | 101 | 2017-2018 |
| <b>Toledo 01</b>  | A | M | Toledo           | 40.575816 | Germany     | <i>8-mar.</i>  | 29-mar.        | 21  | 2015-2016 |

|                      |   |   |                |           |             |                |         |            |           |
|----------------------|---|---|----------------|-----------|-------------|----------------|---------|------------|-----------|
|                      | A | M | Toledo/Badajoz | 38.929082 | -           | 17-oct.        | 5-mar.  | 139        | 2016-2017 |
| <b>Huesca 08</b>     | I | - | Huesca         | 41.867716 | Austria     | 1-nov.         | 21-feb. | 112        | 2015-2016 |
| <b>Ornitela 01</b>   | I | - | Álava          | 42.863029 | Germany     | <i>16-feb.</i> | 18-apr. | <i>61</i>  | 2019-2020 |
| <b>Ornitela 02</b>   | I | - | Huesca         | 41.736111 | Switzerland | <i>4-jan.</i>  | 7-apr.  | <i>93</i>  | 2018-2019 |
|                      | A | - | Huesca         | 41.556404 | Switzerland | 30-oct.        | 9-mar.  | 130        | 2019-2020 |
| <b>Ornitela 42</b>   | A | - | Álava          | 43.065178 | Germany     | <i>15-feb.</i> | 12-apr. | <i>56</i>  | 2018-2019 |
|                      | A | - | Álava          | 43.082405 | Germany     | 16-nov.        | 10-mar. | 114        | 2019-2020 |
| <b>Ornitela 57</b>   | I | - | Segovia        | 41.085445 | France      | <i>13-feb.</i> | 14-apr. | <i>60</i>  | 2018-2019 |
|                      | A | - | Cáceres        | 39.364162 | Switzerland | 10-dec.        | 31-mar. | 111        | 2019-2020 |
| <b>Ornitela 59</b>   | I | - | Huesca         | 41.833813 | Switzerland | <i>28-feb.</i> | 27-mar. | <i>27</i>  | 2019-2020 |
| <b>Ornitela 67</b>   | A | F | Huesca         | 41.835056 | Germany     | <i>4-jan.</i>  | 26-feb. | <i>53</i>  | 2018-2019 |
| <b>Ornitela 67-2</b> | I | - | Huesca         | 41.899185 | Germany     | <i>1-mar.</i>  | 9-apr.  | <i>39</i>  | 2019-2020 |
| <b>Ornitela 72</b>   | A | - | Huesca         | 41.846012 | France      | <i>5-jan.</i>  | 8-feb.  | <i>34</i>  | 2018-2019 |
| <b>Ornitela 73</b>   | A | - | Huesca         | 41.887726 | Germany     | <i>4-jan.</i>  | 31-jan. | <i>27</i>  | 2019-2020 |
| <b>Ornitela 74</b>   | I | - | Huesca         | 41.827923 | Germany     | <i>5-jan.</i>  | 21-apr. | <i>106</i> | 2018-2019 |
|                      | A | - | Huesca         | 41.89352  | France      | 14-nov.        | 5-mar.  | 111        | 2019-2020 |
| <b>Ornitela 78</b>   | A | - | Segovia        | 41.376953 | Germany     | <i>28-jan.</i> | 12-apr. | <i>74</i>  | 2018-2019 |

|                      |   |   |                  |           |             |                |                |     |           |
|----------------------|---|---|------------------|-----------|-------------|----------------|----------------|-----|-----------|
|                      | A | - | Segovia          | 42.274231 | Germany     | 15-nov.        | 2-apr.         | 138 | 2019-2020 |
| <b>Ornitela 79</b>   | A | - | Segovia/Pamplona | 41.44083  | Germany     | 26-nov.        | 23-jan.        | 58  | 2019-2020 |
| <b>Ornitela 82</b>   | A | - | Segovia          | 41.369122 | Germany     | 18-nov.        | 25-jan.        | 68  | 2019-2020 |
| <b>Ornitela 98</b>   | A | - | France           | 45.292576 | Switzerland | 5-dec.         | 10-feb.        | 67  | 2019-2020 |
| <b>Ornitela 96-2</b> | I | - | Huesca           | 41.833031 | Germany     | <i>1-mar.</i>  | 2-apr.         | 32  | 2019-2020 |
| <b>Ornitela 112</b>  | A | - | Álava            | 43.065212 | Belgium     | <i>16-feb.</i> | 28-feb.        | 12  | 2018-2019 |
|                      | A | - | Álava            | 43.031124 | Germany     | 16-nov.        | 12-feb.        | 88  | 2019-2020 |
| <b>Ornitela 151</b>  | I | - | Álava            | 42.900139 | Germany     | <i>16-feb.</i> | 7-apr.         | 50  | 2019-2020 |
| <b>Ornitela 154</b>  | I | - | Álava/France     | 43.665081 | Germany     | <i>16-feb.</i> | 18-apr.        | 61  | 2019-2020 |
| <b>Ornitela 156</b>  | I | - | Álava            | 42.935135 | Germany     | <i>16-feb.</i> | 8-apr.         | 51  | 2019-2020 |
| <b>Ornitela 157</b>  | I | - | Álava/France     | 45.265434 | France      | <i>16-feb.</i> | 2-apr.         | 45  | 2019-2020 |
| <b>Ornitela 163</b>  | I | - | Álava            | 42.903809 | Germany     | <i>16-feb.</i> | 14-apr.        | 57  | 2019-2020 |
| <b>Ornitela 177</b>  | A | - | Álava            | 42.920593 | Germany     | <i>16-feb.</i> | 8-apr.         | 51  | 2019-2020 |
| <b>Ornitela 194</b>  | A | - | Álava/France     | 43.497177 | Germany     | <i>16-feb.</i> | 27-mar.        | 39  | 2019-2020 |
| <b>Ecotone 19</b>    | I | - | Segovia          | 42.076216 | Germany     | <i>28-jan.</i> | 28-mar.        | 59  | 2018-2019 |
|                      | A | - | Burgos           | 42.077099 | -           | 26-nov.        | <i>30-dec.</i> | 34  | 2019-2020 |
| <b>Ecotone 21</b>    | I | - | Huesca           | 41.551916 | Germany     | <i>4-jan.</i>  | 23-apr.        | 109 | 2018-2019 |



|                    |   |   |                   |           |         |                |         |     |           |
|--------------------|---|---|-------------------|-----------|---------|----------------|---------|-----|-----------|
| <b>Ecotone 31</b>  | I | - | Huesca/France     | 41.551916 | Germany | <i>4-jan.</i>  | 7-may.  | 123 | 2018-2019 |
|                    | A | - | Huesca            | 41.893149 | Germany | 9-nov.         | 5-mar.  | 116 | 2019-2020 |
| <b>Ecotone 46</b>  | I | - | Álava             | 43.065983 | Germany | <i>16-feb.</i> | 1-apr.  | 44  | 2018-2019 |
|                    | A | - | Álava             | 43.102633 | Germany | 25-nov.        | 9-mar.  | 104 | 2019-2020 |
| <b>Ecotone 53</b>  | I | - | Huesca            | 41.822367 | Germany | <i>4-jan.</i>  | 1-apr.  | 87  | 2018-2019 |
|                    | A | - | Huesca            | 41.892649 | Germany | 8-nov.         | 12-mar. | 124 | 2019-2020 |
| <b>Ecotone 86</b>  | A | - | Segovia           | 41.421132 | Germany | <i>29-jan.</i> | 14-mar. | 44  | 2018-2019 |
|                    | A | - | Segovia           | 41.422716 | Germany | 29-nov.        | 12-feb. | 75  | 2019-2020 |
| <b>Ecotone 102</b> | I | - | Álava             | 41.376416 | Germany | <i>29-jan.</i> | 24-feb. | 26  | 2018-2019 |
|                    | A | - | Álava             | 41.087883 | Germany | 3-nov.         | 23-feb. | 112 | 2019-2020 |
| <b>Ecotone 106</b> | I | - | Segovia/Salamanca | 41.376132 | Germany | <i>28-jan.</i> | 29-apr. | 91  | 2018-2019 |

**Figure S1.** Wintering areas (95% KDE) used by the 44 tagged Red Kites during their non-breeding seasons in Spain and Southern France. Each color represents one wintering area.

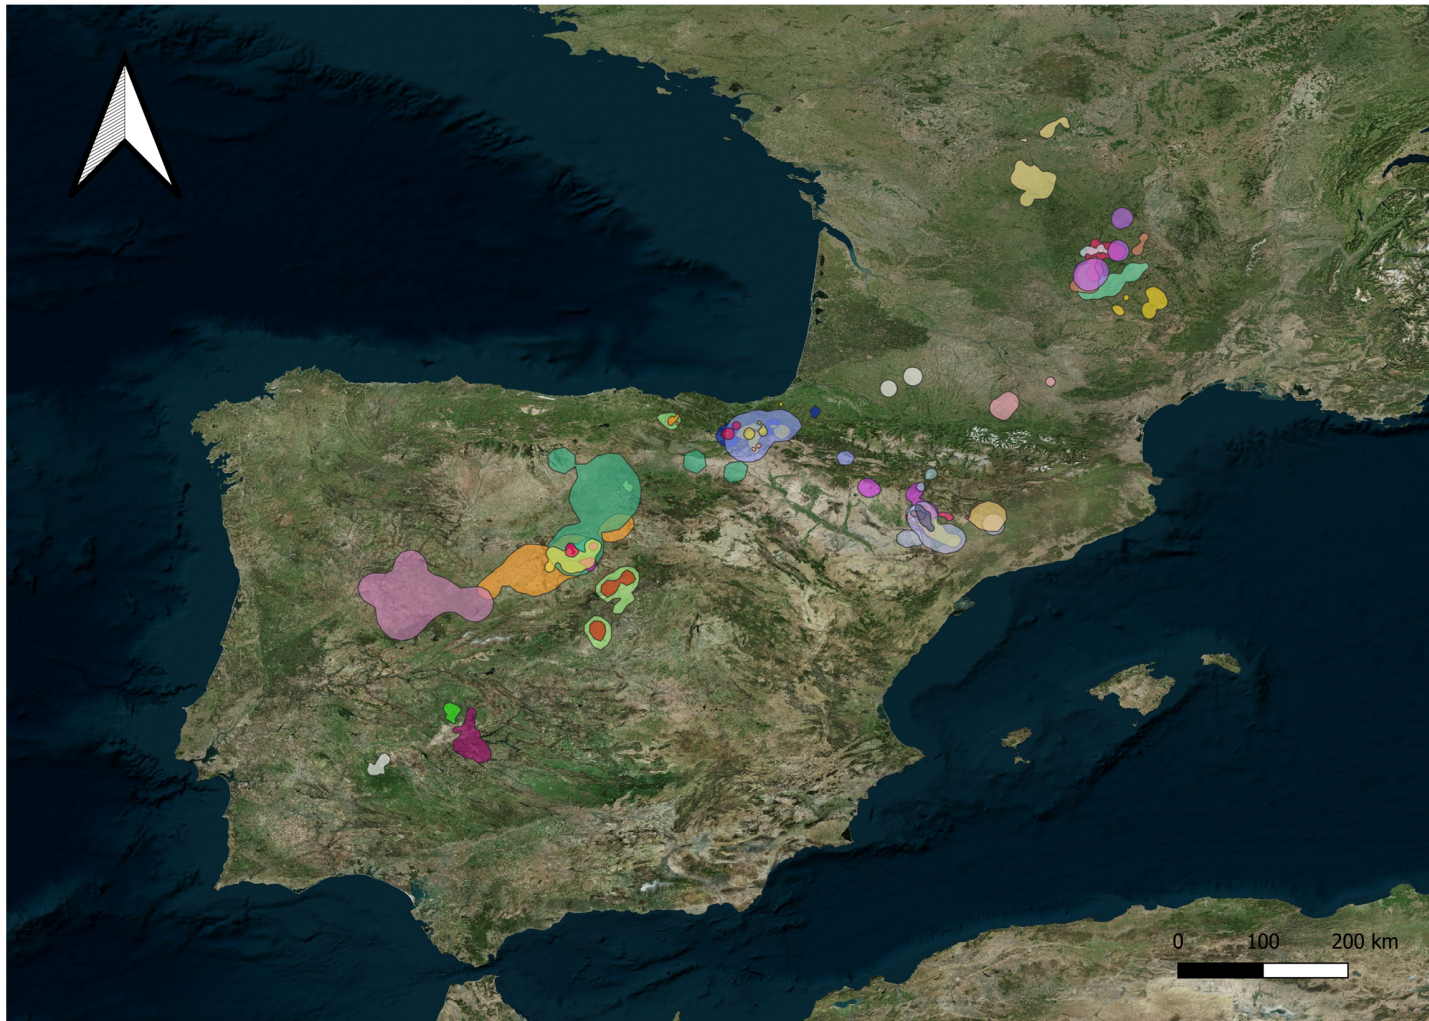

**Figure S2.** Comparison between individuals with one and two areas during the same wintering event based on home range size estimations (MCP, 95% KDE, 75% KDE and 50% KDE).

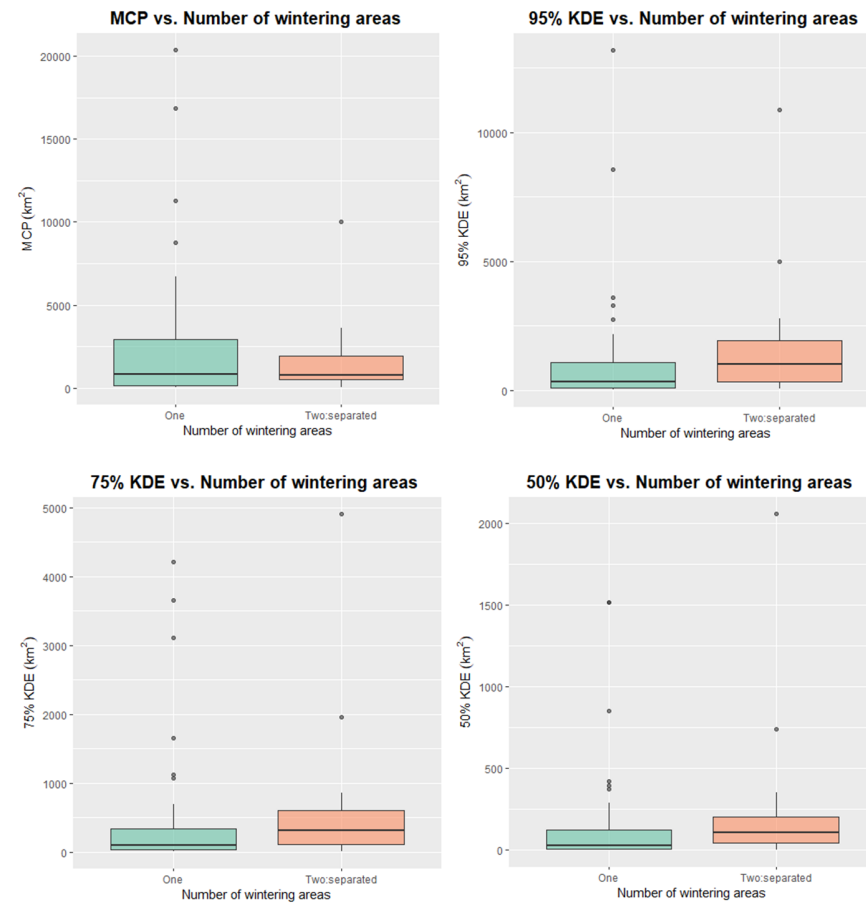

**Figure S3.** Comparison between sexes based on home range size estimations (MCP, 95% KDE, 75% KDE and 50% KDE).

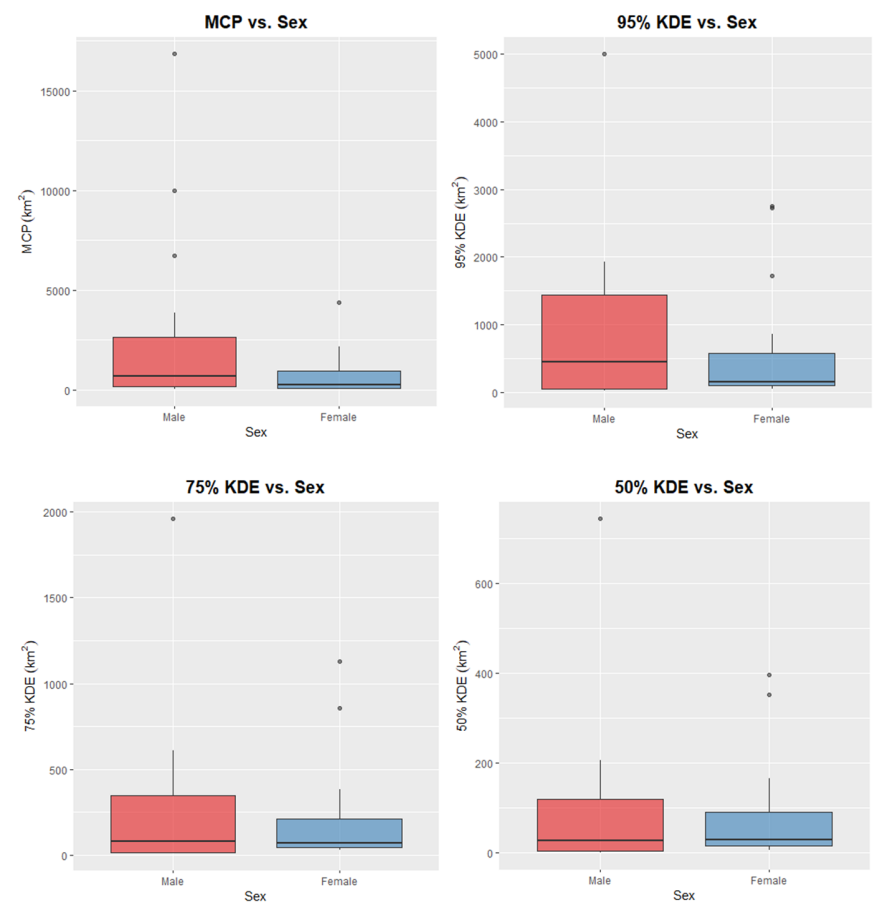



**Figure S4.** Wintering areas (95% KDE) used by immatures (green) and adults (red) Red Kites during their non-breeding seasons in Spain and Southern France.

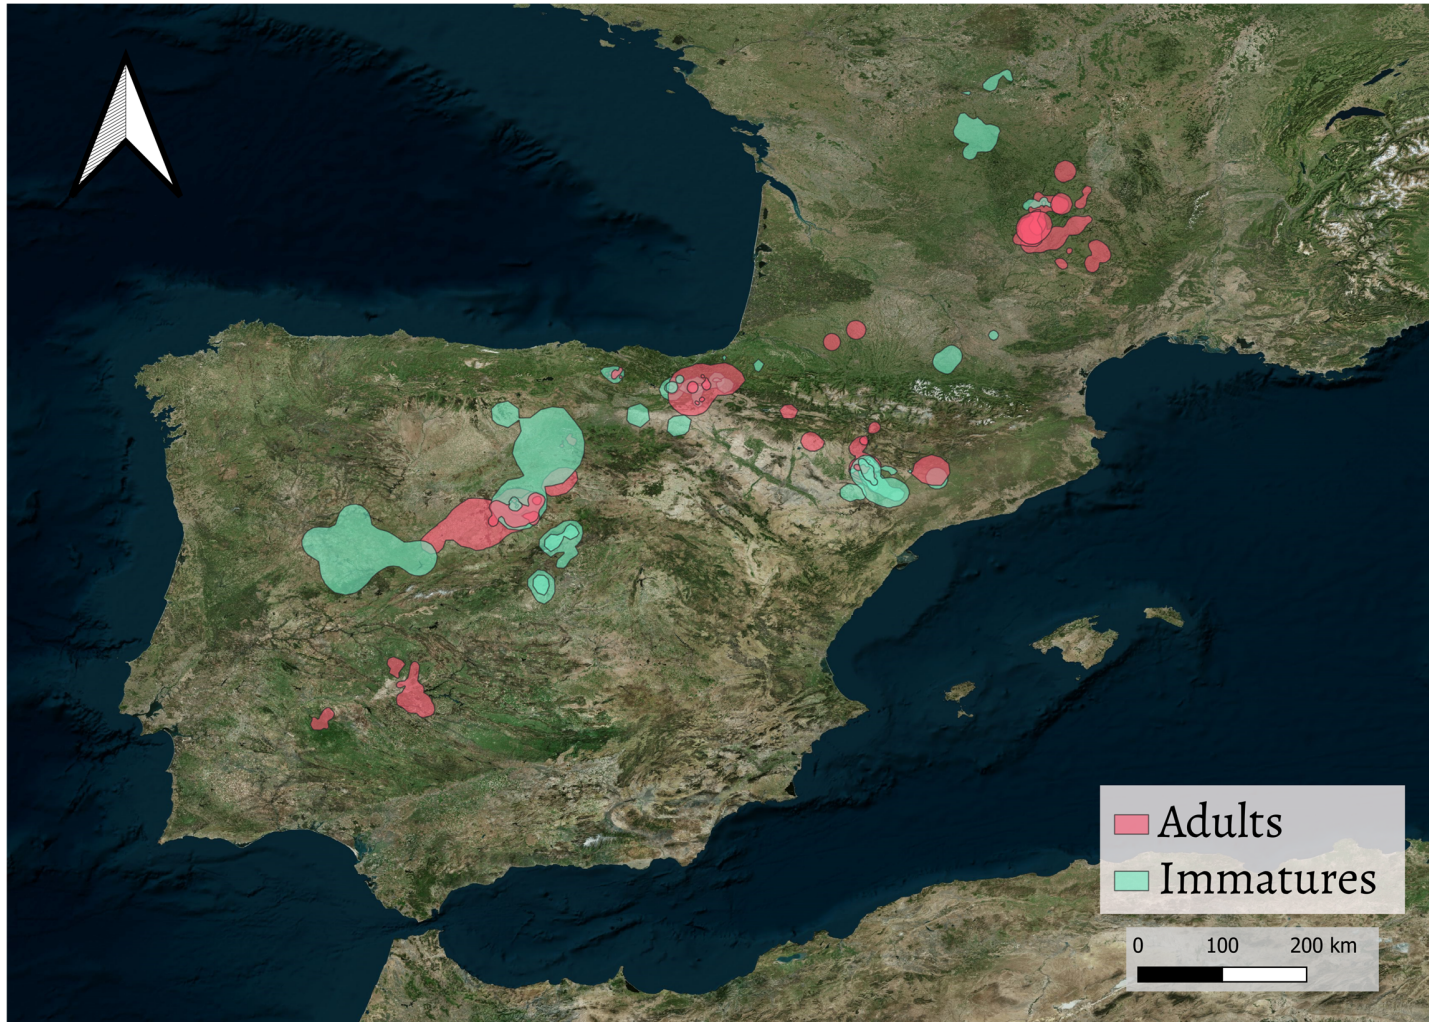

Supplement: s1 [file s1]
